# Supplementary material for: Pandemic disruptions in energy and the environment
Source: Oxford University Press journal article supplement (doi:10.1525/elementa.052), 2020-01-01
Supplement: supplemental_information.docx [file supplemental_information.docx]

**Supplemental material**

# Selected national and regional electricity use data

**Australia**

<https://opennem.org.au/energy/nem/>

**France**

<https://www.rte-france.com/fr/eco2mix/eco2mix-consommation>

**Italy**

<https://www.terna.it/en/electric-system/transparency-report/total-load>

**United Kingdom**

<https://www.nationalgrideso.com/news/how-were-managing-reduced-demand-electricity-through-coronavirus-outbreak>

**Portugal**

<http://www.centrodeinformacao.ren.pt/PT/InformacaoExploracao/Paginas/EstatisticaDiariaDiagrama.aspx>

**Spain**

<https://demanda.ree.es/visiona/peninsula/demanda/total/2020-04-06>

# Selected air quality data

**India**

<https://www.iqair.com/us/india/delhi>
